# Supplementary material
Source: publisher figshare collection journal article supplement (https://geolsoc.figshare.com/ndownloader/files/17291339)
Supplement: Supplementary file 1 [file 17291339]

| **Table S1:** Measured structural data | | | | |
| --- | --- | --- | --- | --- |
| **Stations 1 and 2- Formation: Bucaramanga Gneiss** | | | | |
| **Lat. 6.940421°** | | **Long. -72.98989** | |  |
| **Number** | **Azimuth** | **Dip** | **Pitch** | **Kinematic** |
| 1 | 48 | 56 |  | Normal |
| 2 | 9 | 62 |  | Reverse |
| 3 | 58 | 60 |  | Normal |
| 4 | 353 | 81 |  | Left Lateral |
| 5 | 343 | 54 |  | Undetermined |
| 6 | 310 | 85 |  | Undetermined |
| 7 | 303 | 80 |  | Undetermined |
| 8 | 328 | 72 |  | Undetermined |
| 9 | 7 | 61 |  | Undetermined |
| 10 | 50 | 65 | 70 | Normal |
| 11 | 300 | 76 | 128 | Normal |
| 12 | 31 | 88 | 4 | Left Lateral |
| 13 | 333 | 74 | 52 | Normal |
| 14 | 260 | 51 | 85 | Normal |
| 15 | 295 | 78 | 142 | Normal |
| 16 | 287 | 90 | 173 | Right Lateral |
| 17 | 298 | 88 | 49 | Reverse |
| 18 | 77 | 88 | 155 | Left Lateral |
| 19 | 282 | 90 | 163 | Left Lateral |
| 20 | 270 | 66 | 168 | Right Lateral |
| 21 | 304 | 72 | 4 | Undetermined |
| 22 | 315 | 83 | 169 | Right Lateral |
| 23 | 223 | 70 | 20 | Left Lateral |
| 24 | 245 | 88 | 176 | Right Lateral |
| 25 | 348 | 80 | 55 | Reverse |
| 26 | 340 | 86 | 69 | Reverse |
| 27 | 145 | 61 | 139 | Right Lateral |
| 28 | 155 | 55 | 32 | Reverse |
| 29 | 140 | 60 | 169 | Right Lateral |
| 30 | 268 | 62 | 172 | Right Lateral |
| 31 | 168 | 90 | 71 | Normal |
| 32 | 353 | 61 | 69 | Reverse |
| 33 | 35 | 76 | 61 | Normal |
| 34 | 227 | 69 | 68 | Reverse |
| 35 | 226 | 47 | 72 | Reverse |
| 36 | 134 | 78 | 40 | Right Lateral |
| 37 | 39 | 66 | 150 | Left Lateral |
| 38 | 254 | 63 | 24 | Right Lateral |
| 39 | 39 | 87 | 142 | Right Lateral |
| 40 | 206 | 82 | 44 | Right Lateral |
| 41 | 42 | 60 | 21 | Left Lateral |
| **Number** | **Azimuth** | **Dip** | **Pitch** | **Kinematic** |
| 42 | 264 | 69 | 26 | Right Lateral |
| 43 | 255 | 64 | 33 | Right Lateral |
| 44 | 129 | 87 | 168 | Right Lateral |
| 45 | 140 | 88 | 4 | Right Lateral |
| 46 | 346 | 77 | 167 | Left Lateral |
| 47 | 106 | 59 | 21 | Left Lateral |
| 48 | 4 | 71 | 54 | Normal |
| 49 | 319 | 36 | 95 | Reverse |
| 50 | 357 | 72 | 150 | Left Lateral |
| 51 | 338 | 70 | 50 | Reverse |
| 52 | 357 | 85 | 40 | Undetermined |
| 53 | 165 | 86 | 130 | Reverse |
| 54 | 170 | 70 | 135 | Undetermined |
| 55 | 299 | 50 | 88 | Normal |
| 56 | 315 | 72 | 75 | Normal |
| 57 | 325 | 70 | 100 | Normal |
| 58 | 23 | 61 | 60 | Undetermined |
| 59 | 23 | 80 | 85 | Reverse |
| 60 | 83 | 50 | 160 | Undetermined |
| 61 | 53 | 56 | 160 | Right Lateral |
| 62 | 93 | 88 | 25 | Left Lateral |
| 63 | 56 | 74 | 150 | Undetermined |
| 64 | 37 | 72 | 110 | Normal |
| 65 | 253 | 84 | 22 | Undetermined |
| 66 | 253 | 84 | 42 | Undetermined |
| 67 | 264 | 80 | 25 | Right Lateral |
| 68 | 29 | 40 | 60 | Right Lateral |
| 69 | 43 | 70 | 30 | Right Lateral |
| 70 | 210 | 88 | 42 | Right Lateral |
| 71 | 147 | 65 | 178 | Undetermined |
| 72 | 133 | 84 | 155 | Left Lateral |
| 73 | 169 | 85 | 30 | Left Lateral |
| 74 | 203 | 57 | 20 | Left Lateral |
| 75 | 55 | 70 | 150 | Left Lateral |
| 76 | 135 | 85 |  |  |
| 77 | 320 | 66 |  |  |
| 78 | 314 | 74 |  |  |
| 79 | 300 | 83 |  |  |
| 80 | 149 | 85 |  |  |
| 81 | 124 | 86 |  |  |
| 82 | 119 | 81 |  |  |
| 83 | 324 | 86 |  |  |
| 84 | 314 | 85 |  |  |
| **Number** | **Azimuth** | **Dip** | **Pitch** | **Kinematic** |
| 85 | 329 | 87 |  |  |
| 86 | 149 | 83 |  |  |
| 87 | 321 | 73 |  |  |
| 88 | 75 | 46 |  |  |
| 89 | 164 | 76 |  |  |
| 90 | 78 | 85 |  |  |
| 91 | 155 | 73 |  |  |
| 92 | 184 | 88 |  |  |
| 93 | 272 | 72 |  |  |
| 94 | 29 | 62 |  |  |
| 95 | 346 | 73 |  |  |
| 96 | 354 | 88 |  |  |
| 97 | 0 | 81 |  |  |
| 98 | 310 | 71 |  |  |
| 99 | 283 | 64 |  |  |
| 100 | 299 | 60 |  |  |
| 101 | 255 | 28 |  |  |
| 102 | 338 | 64 |  |  |
| 103 | 307 | 70 |  |  |
| 104 | 30 | 71 |  |  |
| 105 | 340 | 88 |  |  |
| 106 | 23 | 85 |  |  |
| 107 | 321 | 68 | 73 | Left Lateral |
| 108 | 190 | 83 | 129 | Right Lateral |
| 109 | 11 | 81 | 45 | Right Lateral |
| 110 | 34 | 71 | 14 | Right Lateral |
| 111 | 36 | 85 | 51 | Right Lateral |
| 112 | 310 | 74 | 115 | Left Lateral |
| 113 | 280 | 39 | 135 | Left Lateral |
| 114 | 319 | 81 | 80 | Normal |
| 115 | 249 | 77 | 97 | Normal |
| 116 | 329 | 84 | 87 | Normal |
| 117 | 353 | 82 | 73 | Normal |
| 118 | 20 | 68 | 12 | Right Lateral |
| 119 | 76 | 61 | 162 | Left Lateral |
| 120 | 60 | 59 | 174 | Left Lateral |
| 121 | 317 | 54 | 153 | Left Lateral |
| 122 | 140 | 70 | 5 | Undetermined |
| 123 | 344 | 80 | 160 | Right Lateral |
| 124 | 266 | 65 | 165 | Left Lateral |
| 125 | 33 | 85 | 45 | Reverse |
| 126 | 3 | 75 | 70 | Normal |
| 127 | 13 | 70 | 40 | Normal |
| 128 | 5 | 88 | 80 | Normal |
| 129 | 120 | 88 | 160 | Undetermined |
| 130 | 120 | 88 | 90 | Undetermined |
| 131 | 260 | 75 | 74 | Undetermined |
| 132 | 123 | 72 | 30 | Right Lateral |
| 133 | 273 | 55 | 58 | Reverse |
| 134 | 293 | 82 | 110 | Reverse |
| 135 | 10 | 40 | 10 | Right Lateral |
| 136 | 260 | 60 | 66 | Reverse |
| 137 | 260 | 60 | 178 | Right Lateral |
| 138 | 260 | 65 | 130 | Reverse |
| 139 | 260 | 65 | 150 | Reverse |
| 140 | 3 | 70 | 140 | Left Lateral |
| 141 | 355 | 80 | 145 | Left Lateral |
| 142 | 13 | 60 | 135 | Left Lateral |
| 143 | 353 | 64 | 130 | Reverse |
| 144 | 160 | 70 | 140 | Right Lateral |
| 145 | 83 | 85 | 25 | Right Lateral |
| 146 | 86 | 80 | 20 | Left Lateral |
| 147 | 3 | 76 | 52 | Normal |
| 148 | 293 | 89 | 92 | Undetermined |
| 149 | 51 | 80 | 45 | Undetermined |
| 150 | 176 | 85 | 29 | Left Lateral |
| 151 | 184 | 78 | 31 | Left Lateral |
| 152 | 263 | 70 | 30 | Undetermined |
| 153 | 343 | 56 | 148 | Undetermined |
| 154 | 83 | 88 | 80 | Undetermined |
| 155 | 163 | 40 | 150 | Undetermined |
| 156 | 218 | 64 | 50 | Undetermined |

| **Station 3- Formation: Bucaramanga Gneiss and Granito de Pescadero** | | | | |
| --- | --- | --- | --- | --- |
| **Lat. 6.912660°** | |  | **Long. -73.021531°** | |
| **Number** | **Azimuth** | **Dip** | **Pitch** | **Kinematic** |
| 1 | 173 | 58 | 150 |  |
| 2 | 173 | 58 | 110 |  |
| 3 | 30 | 72 |  | Reverse |
| 4 | 11 | 64 |  | Right Lateral |
| 5 | 340 | 64 | 30 |  |
| 6 | 255 | 80 | 146 |  |
| 7 | 17 | 60 |  |  |
| 8 | 23 | 68 |  |  |
| 9 | 151 | 66 |  |  |
| 10 | 30 | 85 |  |  |
| 11 | 155 | 72 |  |  |
| 12 | 167 | 66 |  |  |
| 13 | 170 | 70 |  |  |
| 14 | 175 | 60 |  |  |
| 15 | 40 | 62 |  |  |
| 16 | 159 | 64 |  |  |
| 17 | 176 | 66 |  |  |
| 18 | 180 | 60 |  |  |
| 19 | 195 | 42 |  |  |
| 20 | 205 | 52 |  |  |
| 21 | 175 | 67 |  |  |
| 22 | 185 | 43 |  |  |
| 23 | 210 | 62 |  |  |
| 24 | 205 | 51 |  |  |
| 25 | 205 | 57 |  |  |
| 26 | 168 | 59 |  |  |
| 27 | 203 | 34 |  |  |
| 28 | 225 | 51 |  |  |
| 29 | 0 | 83 |  |  |
| 30 | 267 | 84 |  |  |
| 31 | 185 | 57 |  |  |
| 32 | 85 | 50 |  |  |
| 33 | 267 | 84 |  |  |
| 34 | 113 | 50 |  |  |
| 35 | 20 | 89 |  |  |
| 36 | 227 | 72 |  |  |
| 37 | 30 | 72 |  |  |
| 38 | 263 | 74 |  |  |
| 39 | 243 | 80 |  |  |
| 40 | 13 | 85 |  |  |
| 41 | 290 | 38 |  |  |
| **Number** | **Azimuth** | **Dip** | **Pitch** | **Kinematic** |
| 42 | 327 | 58 |  |  |
| 43 | 291 | 68 |  |  |
| 44 | 163 | 58 |  |  |
| 45 | 283 | 74 |  |  |
| 46 | 287 | 76 |  |  |
| 47 | 27 | 72 |  |  |
| 48 | 137 | 56 |  |  |
| 49 | 53 | 72 |  |  |
| 50 | 253 | 58 |  |  |
| 51 | 25 | 80 |  |  |
| 52 | 3 | 70 |  |  |
| 53 | 127 | 68 |  |  |
| 54 | 139 | 70 |  |  |
| 55 | 35 | 68 |  |  |
| 56 | 19 | 70 |  |  |
| 57 | 13 | 80 |  |  |
| 58 | 20 | 74 |  |  |
| 59 | 0 | 82 |  |  |
| 60 | 300 | 38 |  |  |
| 61 | 143 | 70 |  |  |
| 62 | 135 | 71 |  |  |
| 63 | 122 | 60 |  |  |
| 64 | 147 | 70 |  |  |
| 65 | 143 | 73 |  |  |
| 66 | 11 | 64 |  |  |
| 67 | 115 | 63 |  |  |
| 68 | 55 | 35 |  |  |
| 69 | 120 | 5 |  |  |
| 70 | 110 | 30 |  |  |
| 71 | 286 | 80 |  |  |
| 72 | 143 | 56 |  |  |
| 73 | 105 | 65 |  |  |
| 74 | 119 | 75 |  |  |
| 75 | 105 | 78 |  |  |
| 76 | 298 | 79 |  |  |
| 77 | 315 | 66 |  |  |
| 78 | 255 | 44 |  |  |
| 79 | 301 | 89 |  |  |
| 80 | 28 | 74 |  |  |
| 81 | 217 | 85 |  |  |
| 82 | 144 | 89 |  |  |
| 83 | 130 | 75 |  |  |
| 84 | 130 | 65 |  |  |
| **Number** | **Azimuth** | **Dip** | **Pitch** | **Kinematic** |
| 85 | 150 | 90 |  |  |
| 86 | 144 | 65 |  |  |
| 87 | 302 | 35 |  |  |
| 88 | 330 | 69 |  |  |
| 89 | 145 | 65 |  |  |
| 90 | 129 | 31 |  |  |
| 91 | 147 | 88 | 137 | Right Lateral |
| 92 | 142 | 84 | 140 | Right Lateral |
| 93 | 86 | 87 | 168 | Right Lateral |
| 94 | 275 | 89 | 31 | Right Lateral |
| 95 | 275 | 9 | 34 | Right Lateral |

| **Station 4- Formation: Bucaramanga Gneiss** | | | | |
| --- | --- | --- | --- | --- |
| **Lat. 7.000654°** | |  | **Long. -73.0499488°** | |
| **Number** | **Azimuth** | **Dip** | **Pitch** | **Kinematic** |
| 1 | 223 | 60 |  |  |
| 2 | 94 | 53 |  |  |
| 3 | 320 | 70 |  |  |
| 4 | 142 | 85 |  |  |
| 5 | 170 | 89 |  |  |
| 6 | 105 | 50 |  |  |
| 7 | 118 | 61 |  |  |
| 8 | 50 | 64 |  |  |
| 9 | 83 | 58 |  |  |
| 10 | 119 | 72 |  |  |
| 11 | 140 | 44 |  |  |
| 12 | 120 | 75 |  |  |
| 13 | 167 | 69 |  |  |
| 14 | 186 | 85 |  |  |
| 15 | 200 | 86 |  |  |
| 16 | 136 | 66 |  |  |
| 17 | 127 | 87 |  |  |
| 18 | 68 | 80 |  |  |
| 19 | 113 | 68 |  |  |
| 20 | 123 | 58 |  |  |
| 21 | 75 | 22 |  |  |
| 22 | 141 | 43 |  |  |
| 23 | 152 | 67 |  |  |
| 24 | 165 | 44 |  |  |
| 25 | 161 | 58 |  |  |
| 26 | 134 | 32 |  |  |
| 27 | 350 | 76 |  |  |
| **Number** | **Azimuth** | **Dip** | **Pitch** | **Kinematic** |
| 28 | 83 | 78 |  |  |
| 29 | 125 | 40 |  |  |
| 30 | 184 | 65 |  |  |
| 31 | 149 | 53 |  |  |
| 32 | 44 | 58 |  |  |
| 33 | 143 | 50 |  |  |
| 34 | 70 | 54 |  |  |
| 35 | 90 | 89 | 140 | Left Lateral |
| 36 | 78 | 82 | 126 | Reverse |
| 37 | 85 | 80 | 140 | Normal |
| 38 | 63 | 82 | 120 | Normal |
| 39 | 23 | 60 | 40 | Normal |
| 40 | 357 | 78 | 40 | Normal |
| 41 | 0 | 86 | 64 | Reverse |
| 42 | 356 | 87 | 64 | Reverse |
| 43 | 197 | 88 | 60 | Reverse |
| 44 | 18 | 80 | 128 | Normal |
| 45 | 90 | 71 | 132 | Left Lateral |
| 46 | 3 | 85 | 5 | Reverse |

| **Station 5- Formation: Bucaramanga Gneiss** | | | | |
| --- | --- | --- | --- | --- |
| **Lat. 6.961616°** | |  | **Long. -73.033283°** | |
| **Number** | **Azimuth** | **Dip** | **Pitch** | **Kinematic** |
| 1 | 51 | 80 | 160 | Undetermined |
| 2 | 63 | 68 | 56 | Left Lateral |
| 3 | 63 | 68 | 178 | Left Lateral |
| 4 | 20 | 79 | 140 | Normal |
| 5 | 31 | 80 | 146 | Undetermined |
| 6 | 20 | 79 | 140 | Undetermined |
| 7 | 43 | 54 | 55 | Undetermined |
| 8 | 38 | 68 | 60 | Undetermined |
| 9 | 38 | 68 | 32 | Undetermined |
| 10 | 172 | 82 | 42 | Normal |
| 11 | 13 | 70 | 160 | Undetermined |
| 12 | 10 | 85 | 150 | Undetermined |
| 13 | 303 | 80 | 60 | Undetermined |
| 14 | 348 | 84 | 66 | Right Lateral |
| 15 | 123 | 70 | 140 | Left Lateral |
| 16 | 141 | 78 | 137 | Left Lateral |
| 17 | 146 | 58 | 139 | Left Lateral |
| 18 | 228 | 89 | 56 | Right Lateral |
| 19 | 340 | 64 | 175 | Left Lateral |
| **Number** | **Azimuth** | **Dip** | **Pitch** | **Kinematic** |
| 20 | 329 | 83 | 156 | Undetermined |
| 21 | 134 | 89 | 20 | Left Lateral |
| 22 | 321 | 83 | 156 | Left Lateral |
| 23 | 134 | 84 | 151 | Left Lateral |
| 24 | 130 | 84 | 128 | Left Lateral |
| 25 | 120 | 73 | 130 | Left Lateral |
| 26 | 152 | 52 | 156 | Right Lateral |

| **Station 6- Formation: Bucaramanga Gneiss** | | | | |
| --- | --- | --- | --- | --- |
| **Lat. 7.028918°** | |  | **Long. -73.059877°** | |
| **Number** | **Azimuth** | **Dip** | **Pitch** | **Kinematic** |
| 1 | 310 | 72 | 15 | Left Lateral |
| 2 | 213 | 89 | 10 | Right Lateral |
| 3 | 225 | 70 | 15 | Undetermined |
| 4 | 16 | 73 | 35 | Right Lateral |
| 5 | 19 | 76 | 22 | Right Lateral |
| 6 | 277 | 42 | 32 | Normal |
| 7 | 327 | 32 | 88 | Undetermined |
| 8 | 61 | 90 | 1 | Right Lateral |
| 9 | 40 | 48 | 31 | Right Lateral |
| 10 | 3 | 90 | 36 | Right Lateral |
| 11 | 264 | 32 | 35 | Right Lateral |
| 12 | 74 | 56 | 140 | Normal |
| 13 | 199 | 9 | 120 | Normal |
| 14 | 84 | 38 | 145 | Normal |
| 15 | 264 | 32 | 35 | Right Lateral |
| 16 | 77 | 80 | 50 | Right Lateral |
| 17 | 79 | 83 | 64 | Right Lateral |
| 18 | 54 | 28 | 36 | Undetermined |
| 19 | 128 | 34 | 32 | Undetermined |
| 20 | 46 | 72 | 60 | Reverse |
| 21 | 43 | 70 | 55 | Normal |

| **Station 7- Formation: Bucaramanga Gneiss** | | | | |
| --- | --- | --- | --- | --- |
| **Lat. 7.036177°** | | **Long. -73.070396°** | | |
| **Number** | **Azimuth** | **Dip** | **Pitch** | **Kinematic** |
| 1 | 267 | 79 |  |  |
| 2 | 247 | 50 |  |  |
| 3 | 66 | 60 |  |  |
| 4 | 249 | 87 |  |  |
| 5 | 83 | 82 |  |  |
| 6 | 104 | 78 |  |  |
| **Number** | **Azimuth** | **Dip** | **Pitch** | **Kinematic** |
| 7 | 345 | 62 |  |  |
| 8 | 254 | 60 |  |  |
| 9 | 343 | 42 |  |  |
| 10 | 93 | 64 |  |  |
| 11 | 70 | 65 |  |  |
| 12 | 23 | 50 |  |  |
| 13 | 293 | 78 |  |  |
| 14 | 95 | 82 |  |  |
| 15 | 165 | 78 |  |  |
| 16 | 90 | 75 |  |  |
| 17 | 219 | 57 |  |  |
| 18 | 235 | 82 |  |  |
| 19 | 330 | 44 |  |  |
| 20 | 15 | 50 |  |  |
| 21 | 335 | 58 |  |  |
| 22 | 53 | 88 |  |  |
| 23 | 328 | 40 |  |  |
| 24 | 296 | 64 |  |  |
| 25 | 323 | 50 |  |  |
| 26 | 3 | 52 |  |  |
| 27 | 330 | 38 |  |  |
| 28 | 324 | 48 |  |  |
| 29 | 121 | 58 |  |  |
| 30 | 197 | 72 |  |  |
| 31 | 346 | 70 |  |  |
| 32 | 13 | 72 |  |  |
| 33 | 300 | 37 |  |  |
| 34 | 285 | 54 |  |  |
| 35 | 60 | 48 |  |  |
| 36 | 30 | 70 |  |  |
| 37 | 220 | 47 |  |  |
| 38 | 358 | 61 |  |  |
| 39 | 2 | 45 |  |  |
| 40 | 356 | 46 |  |  |
| 41 | 355 | 48 |  |  |
| 42 | 4 | 55 |  |  |
| 43 | 6 | 57 |  |  |
| 44 | 234 | 59 |  |  |
| 45 | 57 | 84 | 20 | Undetermined |
| 46 | 251 | 35 | 103 | Reverse |
| 47 | 166 | 76 | 103 | Reverse |
| 48 | 356 | 76 | 14 | Left Lateral |
| 49 | 13 | 61 | 65 | Reverse |
| **Number** | **Azimuth** | **Dip** | **Pitch** | **Kinematic** |
| 50 | 25 | 34 | 54 | Reverse |
| 51 | 10 | 41 | 89 | Reverse |
| 52 | 359 | 26 | 44 | Reverse |
| 53 | 125 | 56 | 140 | Undetermined |
| 54 | 76 | 56 | 42 | Undetermined |
| 55 | 260 | 69 | 28 | Left Lateral |
| 56 | 320 | 58 | 6 | Left Lateral |
| 57 | 300 | 58 | 4 | Left Lateral |
| 58 | 325 | 67 | 9 | Left Lateral |
| 59 | 60 | 64 | 157 | Left Lateral |
| 60 | 343 | 42 |  | Reverse |
| 61 | 64 | 78 |  | Left Lateral |
| 62 | 300 | 72 |  | Normal |
| 63 | 98 | 90 |  | Right Lateral |
| 64 | 280 | 90 |  | Right Lateral |
| 65 | 10 | 44 |  | Left Lateral |
| 66 | 56 | 74 |  | Right Lateral |

| **Station 8 - Formation: Bucaramanga Gneiss** | | | | |
| --- | --- | --- | --- | --- |
| **Lat. 7.123625°** | |  | **Long. -73.087369°** | |
| **Number** | **Azimuth** | **Dip** | **Pitch** | **Kinematic** |
| 1 | 359 | 36 | 40 | Reverse |
| 2 | 80 | 20 | 110 | Undetermined |
| 3 | 13 | 64 | 165 | Left Lateral |
| 4 | 320 | 65 | 45 | Undetermined |
| 5 | 70 | 82 | 160 | Left Lateral |
| 6 | 130 | 78 | 16 | Undetermined |
| 7 | 340 | 86 | 0 | Undetermined |
| 8 | 124 | 46 |  |  |
| 9 | 100 | 68 |  |  |
| 10 | 90 | 54 |  |  |
| 11 | 92 | 68 |  |  |
| 12 | 123 | 42 |  |  |
| 13 | 63 | 60 |  |  |
| 14 | 130 | 50 |  |  |
| 15 | 3 | 52 |  |  |
| 16 | 340 | 80 |  |  |
| 17 | 333 | 86 |  |  |
| 18 | 360 | 84 |  |  |
| 19 | 30 | 72 |  |  |
| 20 | 233 | 61 |  |  |

| **Station 9- Formation: Bucaramanga Gneiss and Tiburon** | | | | |
| --- | --- | --- | --- | --- |
| **Lat. 7.173866°** | |  | **Long. -73.124033°** | |
| **Number** | **Azimuth** | **Dip** | **Pitch** | **Kinematic** |
| 1 | 65 | 58 | 126 | Reverse |
| 2 | 15 | 84 | 150 | Left Lateral |
| 3 | 148 | 70 | 89 | Normal |
| 4 | 290 | 80 | 70 | Undetermined |
| 5 | 161 | 80 | 50 | Reverse |
| 6 | 148 | 76 | 5 | Left Lateral |
| 7 | 143 | 68 | 80 | Normal |
| 8 | 172 | 65 | 115 | Reverse |
| 9 | 41 | 58 | 71 | Normal |
| 10 | 143 | 40 | 38 | Undetermined |
| 11 | 38 | 60 | 79 | Normal |
| 12 | 57 | 80 | 80 | Normal |
| 13 | 3 | 72 | 70 | Undetermined |
| 14 | 315 | 72 | 110 | Reverse |
| 15 | 336 | 60 | 105 | Reverse |
| 16 | 10 | 70 | 125 | Reverse |
| 17 | 118 | 70 | 110 | Left Lateral |
| 18 | 315 | 60 | 155 | Left Lateral |
| 19 | 50 | 72 | 142 | Left Lateral |
| 20 | 90 | 82 | 35 | Right Lateral |
| 21 | 63 | 70 | 60 | Normal |
| 22 | 63 | 70 | 34 | Reverse |
| 23 | 63 | 70 | 132 | Undetermined |
| 24 | 63 | 70 | 26 | Undetermined |
| 25 | 330 | 64 | 164 | Left Lateral |
| 26 | 6 | 64 | 110 | Undermined |
| 27 | 323 | 82 | 170 | Right Lateral |
| 28 | 336 | 76 | 135 | Right Lateral |
| 29 | 195 | 80 |  |  |
| 30 | 167 | 77 |  |  |
| 31 | 145 | 76 |  |  |
| 32 | 175 | 64 |  |  |
| 33 | 336 | 72 |  |  |
| 34 | 335 | 68 |  |  |
| 35 | 320 | 70 |  |  |
| 36 | 280 | 70 |  |  |
| 37 | 73 | 54 |  |  |
| 38 | 353 | 68 |  |  |

| **Station 10- Formation: Tambor** | | | | |
| --- | --- | --- | --- | --- |
| **Lat. 6.897670°** | |  | **Long. -73.175298°** | |
| **Number** | **Azimuth** | **Dip** | **Pitch** | **Kinematic** |
| 1 | 155 | 62 | 25 | Reverse |
| 2 | 175 | 89 | 118 | Reverse |
| 3 | 174 | 89 | 138 | Reverse |
| 4 | 115 | 74 | 142 | Reverse |
| 5 | 180 | 72 | 130 | Reverse |
| 6 | 116 | 59 | 116 | Normal |
| 7 | 155 | 78 | 10 | Right Lateral |
| 8 | 190 | 38 | 55 | Reverse |
| 9 | 350 | 81 | 45 | Reverse |
| 10 | 165 | 77 | 124 | Reverse |
| 11 | 90 | 89 | 159 | Right Lateral |
| 12 | 120 | 62 | 118 | Normal |
| 13 | 165 | 60 | 120 | Reverse |
| 14 | 160 | 45 | 135 | Left Lateral |
| 15 | 334 | 72 | 168 | Left Lateral |
| 16 | 144 | 54 | 44 | Right Lateral |
| 17 | 157 | 58 | 28 | Right Lateral |
| 18 | 145 | 64 | 44 | Right Lateral |
| 19 | 151 | 48 | 25 | Right Lateral |
| 20 | 136 | 52 | 28 | Right Lateral |
| 21 | 141 | 36 | 28 | Right Lateral |
| 22 | 130 | 78 | 165 | Left Lateral |
| 23 | 338 | 67 | 32 | Right Lateral |
| 24 | 231 | 82 | 47 | Reverse |
| 25 | 140 | 68 | 137 | Left Lateral |
| 26 | 42 | 41 | 165 | Left Lateral |
| 27 | 297 | 70 | 50 | Normal |
| 28 | 14 | 83 | 80 | Reverse |
| 29 | 182 | 62 | 128 | Reverse |
| 30 | 294 | 85 | 78 | Undetermined |
| 31 | 37 | 60 | 58 | Reverse |
| 32 | 43 | 80 | 55 | Reverse |
| 33 | 172 | 46 | 140 | Normal |
| 34 | 345 | 68 | 175 | Undetermined |
| 35 | 348 | 68 | 45 | Undetermined |
| 36 | 200 | 52 | 36 | Undetermined |
| 37 | 16 | 87 | 93 | Reverse |
| 38 | 155 | 71 |  |  |
| 39 | 135 | 53 |  |  |
| 40 | 145 | 65 |  |  |
| 41 | 140 | 53 |  |  |
| **Number** | **Azimuth** | **Dip** | **Pitch** | **Kinematic** |
| 42 | 134 | 64 |  | 42 |
| 43 | 1 | 70 |  |  |

| **Station 11- Formation: Giron** | | | | |
| --- | --- | --- | --- | --- |
| **Lat. 7.106894°** | |  | **Long. -73.184170°** | |
| **Number** | **Azimuth** | **Dip** | **Pitch** | **Kinematic** |
| 1 | 10 | 86 | 94 | Reverse |
| 2 | 10 | 86 | 148 | Reverse - Left Lateral |
| 3 | 280 | 76 | 75 | Reverse |
| 4 | 264 | 80 | 15 | Undetermined |
| 5 | 355 | 72 | 110 | Reverse |
| 6 | 115 | 80 | 135 | Reverse |
| 7 | 120 | 70 | 120 | Reverse |
| 8 | 353 | 82 |  | Left Lateral |
| 9 | 351 | 70 |  | Undetermined |
| 10 | 23 | 66 |  | Undetermined |
| 11 | 343 | 86 |  | Undetermined |
| 12 | 7 | 87 |  | Undetermined |
| 13 | 273 | 80 |  | Undetermined |
| 14 | 173 | 80 |  | Undetermined |
| 15 | 340 | 80 |  | Undetermined |
| 16 | 238 | 80 |  | Undetermined |
| 17 | 53 | 89 |  | Undetermined |
| 18 | 80 | 82 |  | Undetermined |
| 19 | 65 | 80 |  | Undetermined |
| 20 | 83 | 86 |  | Undetermined |
| 21 | 84 | 85 |  | Undetermined |
| 22 | 150 | 42 |  | Reverse |
| 23 | 150 | 66 |  | Reverse |
| 24 | 185 | 44 |  | Reverse |
| 25 | 166 | 54 |  | Reverse |
| 26 | 140 | 65 |  | Reverse |
| 27 | 353 | 82 |  | Left Lateral |
| 28 | 150 | 42 |  | Reverse |
| 29 | 150 | 66 |  | Reverse |
| 30 | 185 | 44 |  | Reverse |
| 31 | 166 | 54 |  | Reverse |
| 32 | 140 | 65 |  | Reverse |
| 33 | 148 | 34 | 30 | Reverse |
| 34 | 146 | 48 | 40 | Reverse |
| 35 | 112 | 60 | 42 | Reverse |
| **Station 12 - Formation: Granito de Pescadero** | | | | |
| **Lat. 6.913371°** | |  | **Long. -73.005661°** | |
| **Number** | **Azimuth** | **Dip** | **Pitch** | **Kinematic** |
| 1 | 165 | 75 |  |  |
| 2 | 158 | 75 | 16 | Left Lateral |
| 3 | 114 | 66 | 170 | Right Lateral |
| 4 | 146 | 76 | 18 |  |
| 5 | 151 | 75 | 10 |  |
| 6 | 156 | 59 |  |  |
| 7 | 310 | 71 | 10 | Left Lateral |
| 8 | 171 | 71 | 140 |  |
| 9 | 344 | 88 | 10 | Left Lateral |

| **Station 13 - Formation: Bucaramanga Gneiss and Silgarà** | | | | |
| --- | --- | --- | --- | --- |
| **Lat. 7.189467°** | |  | **Long. -73.078258°** | |
| **Number** | **Azimuth** | **Dip** | **Pitch** | **Kinematic** |
| 1 | 105 | 71 |  |  |
| 2 | 274 | 78 | 145 |  |
| 3 | 155 | 70 |  |  |
| 4 | 50 | 67 | 130 | Right Lateral |
| 5 | 46 | 67 | 150 | Right Lateral |
| 6 | 85 | 80 | 150 |  |
| 7 | 46 | 41 | 170 | Right Lateral |
| 8 | 55 | 60 | 140 | Right Lateral |
| 9 | 165 | 75 | 165 | Left Lateral |
| 10 | 350 | 80 | 80 | Normal |
| 11 | 30 | 72 | 70 | Normal |
| 12 | 150 | 70 | 170 | Left Lateral |
| 13 | 28 | 74 | 10 | Right Lateral |
| 14 |  |  | 80 | Normal |
| 15 | 225 | 37 |  |  |
| 16 | 39 | 51 | 80 |  |
| 17 | 51 | 41 | 110 |  |
| 18 | 218 | 45 | 80 |  |
| 19 | 340 | 64 |  |  |
| 20 | 58 | 63 | 55 | Normal |
| 21 | 64 | 55 | 75 |  |
| 22 | 51 | 65 | 20 |  |
| 23 | 60 | 51 | 40 |  |
| 24 | 60 | 76 | 50 |  |
